# Supplementary material
Source: MDPI journal article supplement (https://www.mdpi.com/1424-8247/16/2/273)
Supplement: s1 [file s1]

# Towards radiolabeled EGFR-specific peptides: Alternatives to GE11

**Benedikt Judmann,<sup>1,2</sup> Björn Wängler,<sup>2</sup> Ralf Schirmacher,<sup>3</sup> Gert Fricker,<sup>4</sup> Carmen Wängler<sup>1\*</sup>**

<sup>1</sup> Biomedical Chemistry, Clinic of Radiology and Nuclear Medicine, Medical Faculty Mannheim, Heidelberg University, 68167 Mannheim, Germany

<sup>2</sup> Molecular Imaging and Radiochemistry, Clinic of Radiology and Nuclear Medicine, Medical Faculty Mannheim, Heidelberg University, 68167 Mannheim, Germany

<sup>3</sup> Department of Oncology, Division of Oncological Imaging, University of Alberta, Edmonton, AB T6G 1Z2, Canada

<sup>4</sup> Institute of Pharmacy and Molecular Biotechnology, University of Heidelberg, 69120 Heidelberg, Germany

## Content

|                                                                                                                                                                                                                                                             |               |
|-------------------------------------------------------------------------------------------------------------------------------------------------------------------------------------------------------------------------------------------------------------|---------------|
| Analytical HPLC chromatograms of <b>1</b> – <b>11</b>                                                                                                                                                                                                       | page S2       |
| Results of the determination of the stability of [ <sup>68</sup> Ga]Ga- <b>1</b> – [ <sup>68</sup> Ga]Ga- <b>11</b> in human serum (analytical radio-HPLC chromatograms of the tracers incubated for 0, 15, 30, 45, 60, 75 and 90 minutes with human serum) | pages S2 – S7 |

## Analytical HPLC chromatograms of 1 – 11

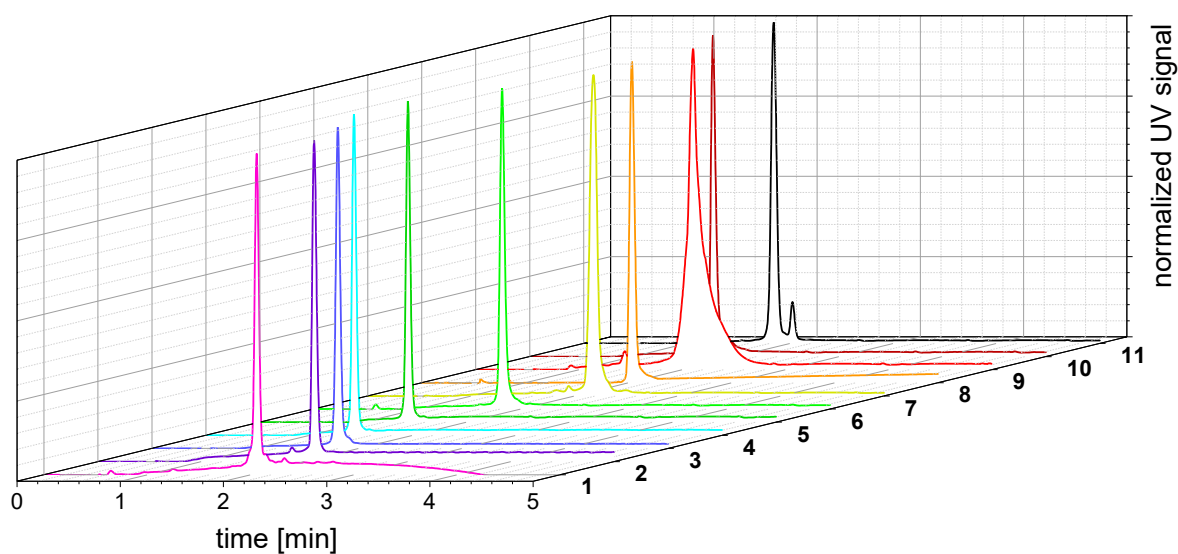

Figure S1: Analytical HPLC chromatograms of 1 – 11 after purification.

**Results of the determination of the stability of  $[^{68}\text{Ga}]\text{Ga-1}$  –  $[^{68}\text{Ga}]\text{Ga-11}$  in human serum (analytical radio-HPLC chromatograms of the tracers incubated for 0, 15, 30, 45, 60, 75 and 90 minutes with human serum)**

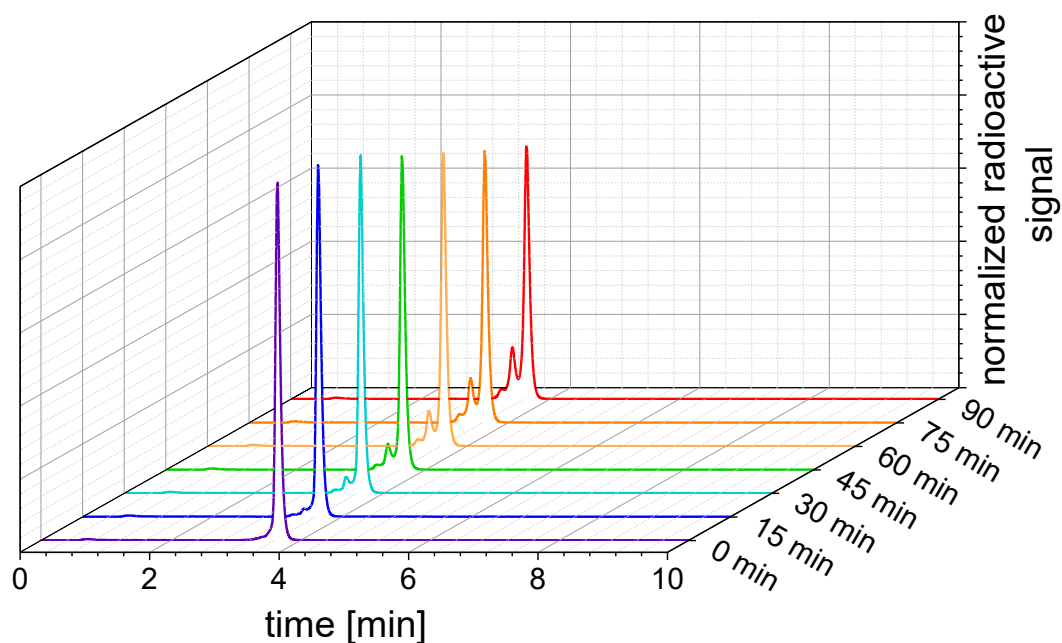

Figure S2: Analytical radio-HPLC chromatograms of  $[^{68}\text{Ga}]\text{Ga-1}$  at different time points of incubation with human serum.

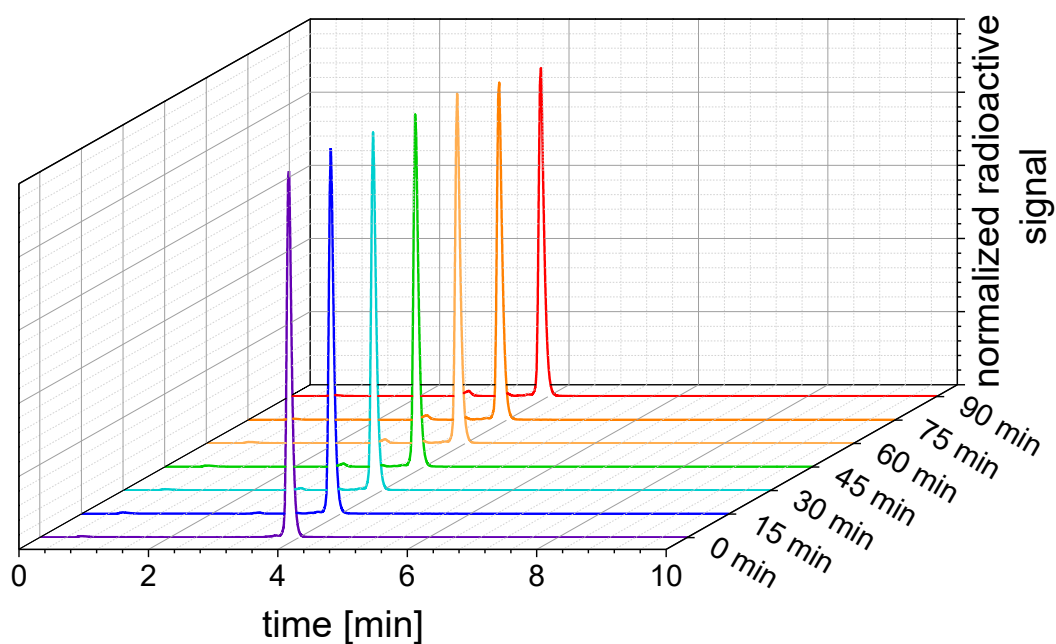

Figure S3: Analytical radio-HPLC chromatograms of  $[^{68}\text{Ga}]\text{Ga-2}$  at different time points of incubation with human serum.

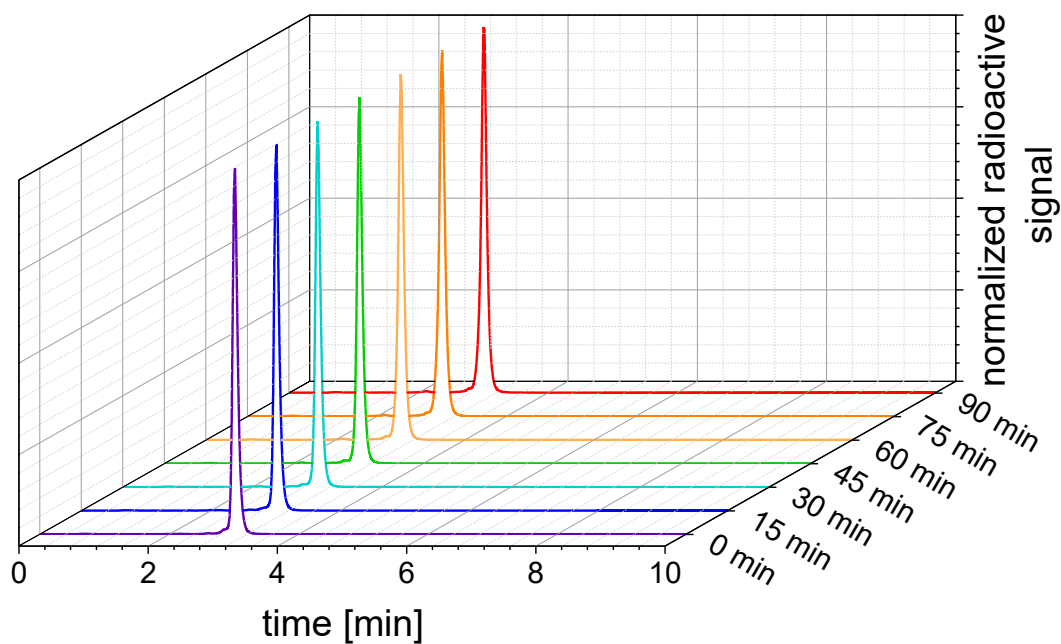

Figure S4: Analytical radio-HPLC chromatograms of  $[^{68}\text{Ga}]\text{Ga-3}$  at different time points of incubation with human serum.

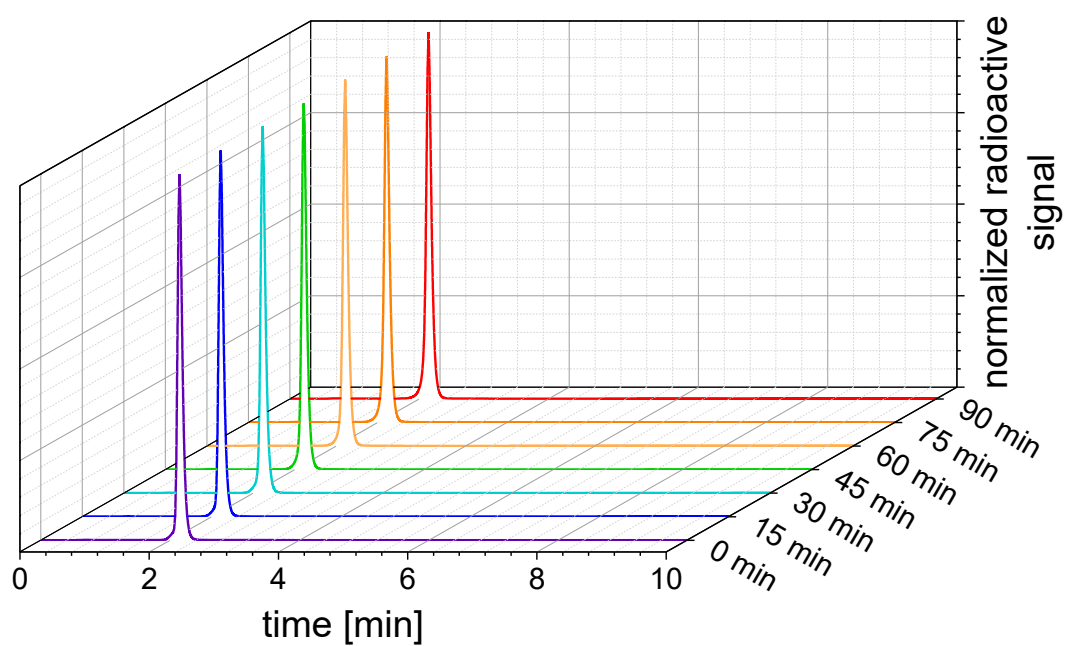

Figure S5: Analytical radio-HPLC chromatograms of  $[^{68}\text{Ga}]\text{Ga-4}$  at different time points of incubation with human serum.

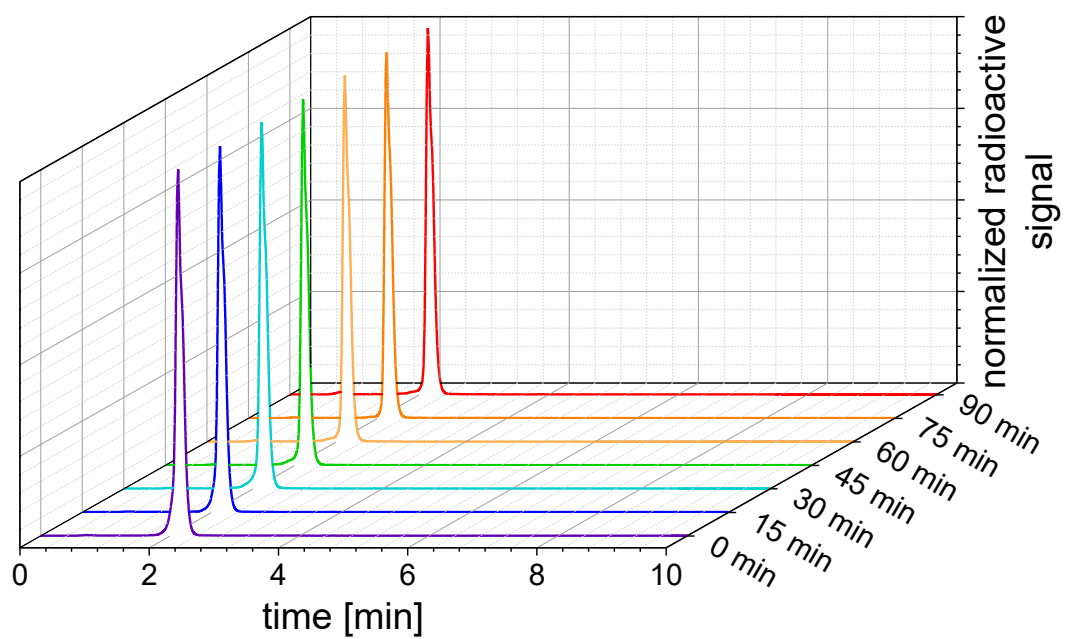

Figure S6: Analytical radio-HPLC chromatograms of  $[^{68}\text{Ga}]\text{Ga-5}$  at different time points of incubation with human serum.

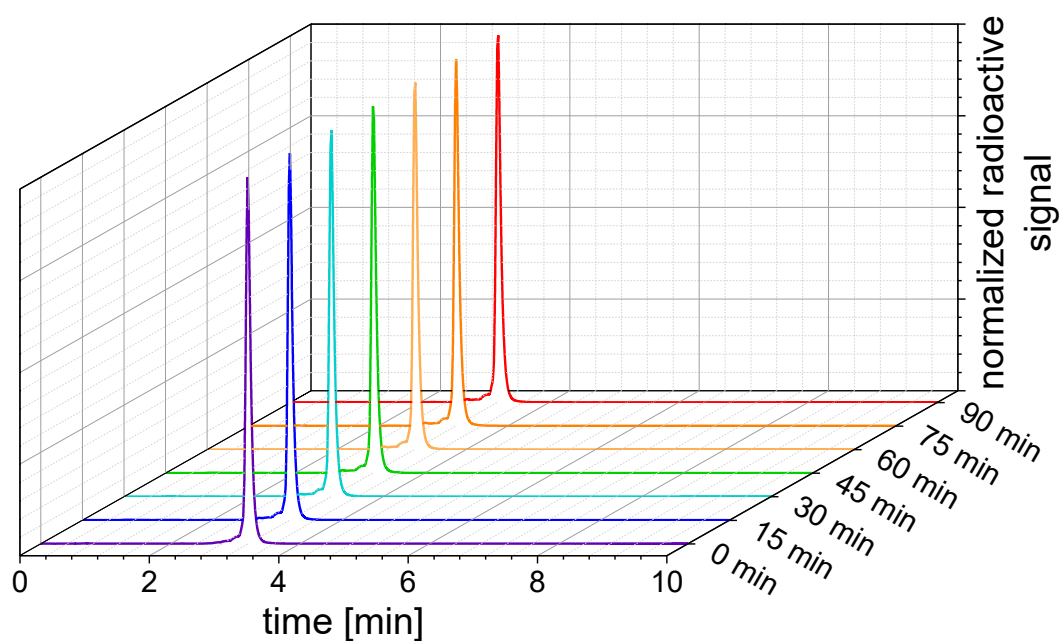

Figure S7: Analytical radio-HPLC chromatograms of  $[^{68}\text{Ga}]\text{Ga-6}$  at different time points of incubation with human serum.

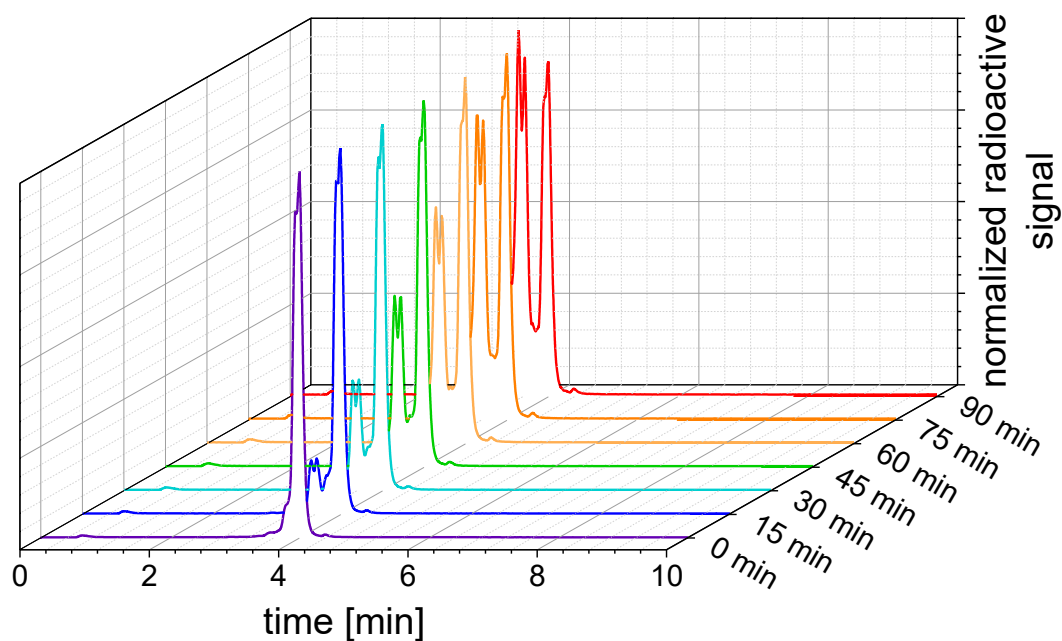

Figure S8: Analytical radio-HPLC chromatograms of  $[^{68}\text{Ga}]\text{Ga-7}$  at different time points of incubation with human serum.

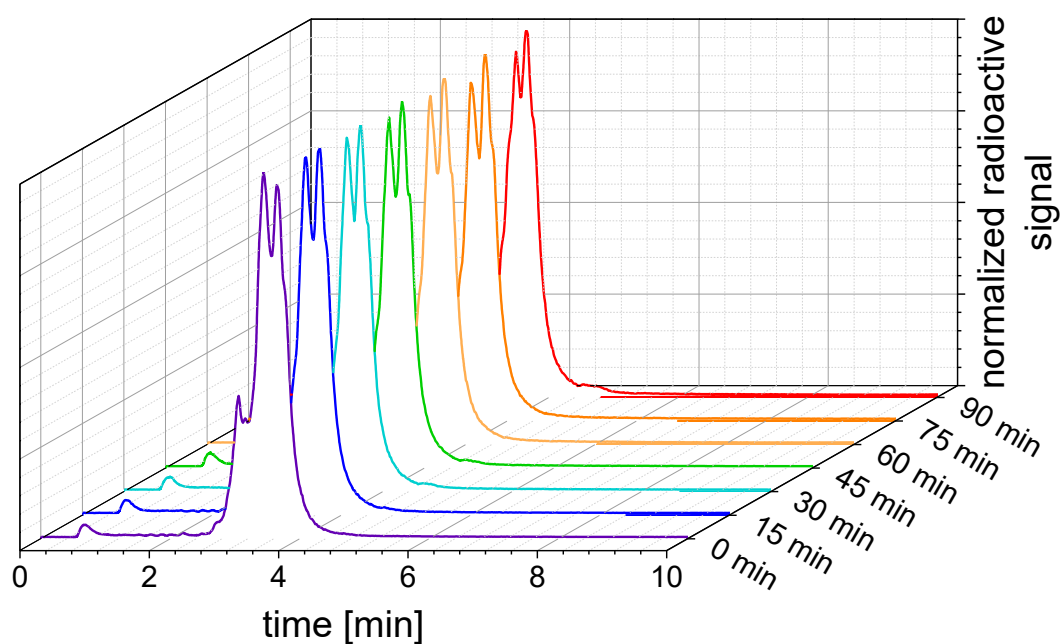

Figure S9: Analytical radio-HPLC chromatograms of  $[^{68}\text{Ga}]\text{Ga-8}$  at different time points of incubation with human serum.

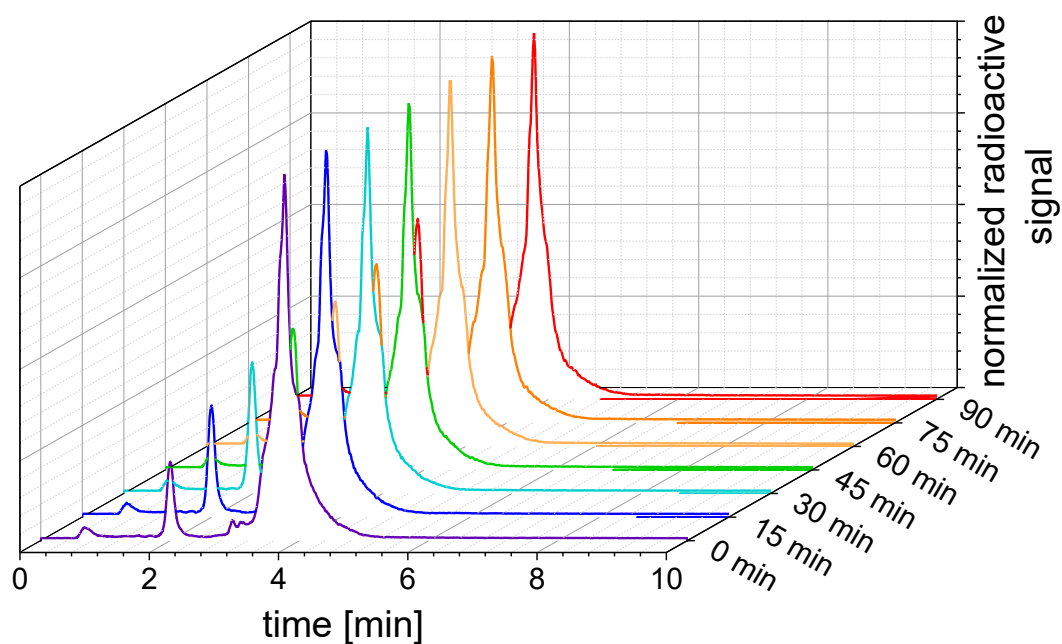

Figure S10: Analytical radio-HPLC chromatograms of  $[^{68}\text{Ga}]\text{Ga-9}$  at different time points of incubation with human serum.

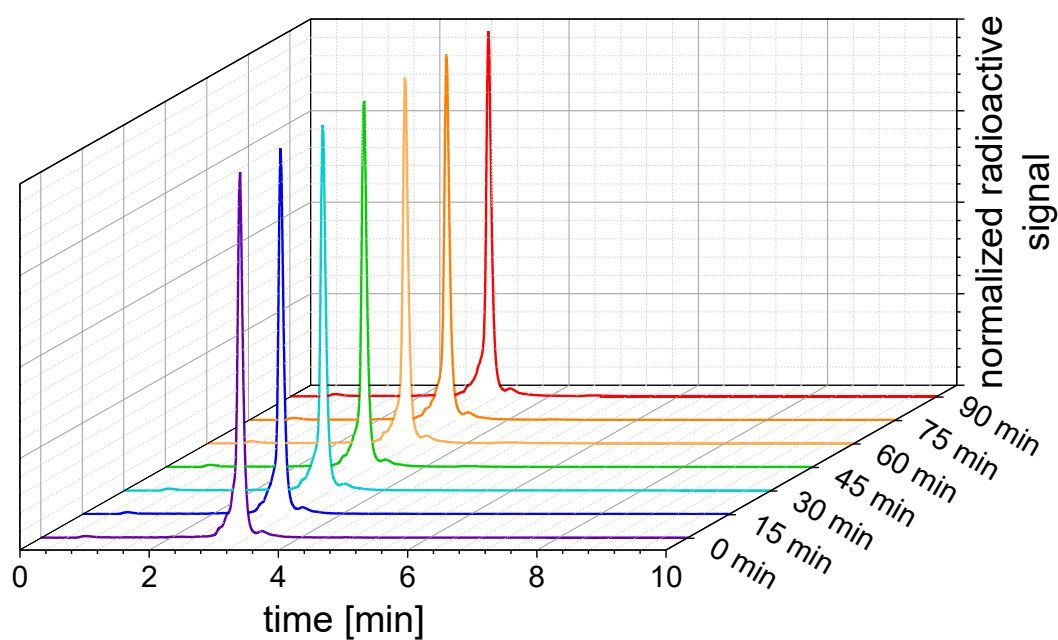

Figure S11: Analytical radio-HPLC chromatograms of  $[^{68}\text{Ga}]\text{Ga-10}$  at different time points of incubation with human serum.

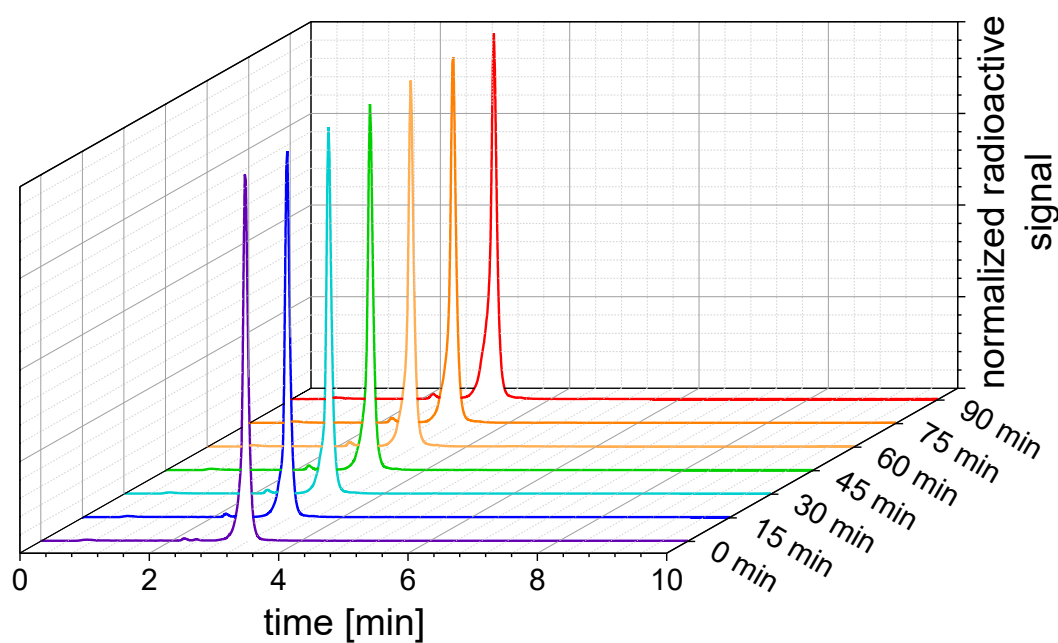

Figure S12: Analytical radio-HPLC chromatograms of  $[^{68}\text{Ga}]\text{Ga-11}$  at different time points of incubation with human serum.
